# Supplementary material
Source: MDPI journal article supplement (https://www.mdpi.com/2673-9623/2/1/2)
Supplement: s1 [file s1]

Archive with 1 entries (1 files):
- appliedchem-1546120-supplementary.pdf
