# Supplementary material
Source: MDPI journal article supplement (https://www.mdpi.com/2673-9623/2/1/2)
Supplement: s1 [file s1 › appliedchem-1546120-supplementary.pdf]

# Supplementary Materials: Application of a Universal Calibration Method for True Molar Mass Determination of Fluoro-Derivatized Technical Lignins by Size-Exclusion Chromatography

Esakkiammal Sudha Esakkimuthu, Nathalie Marlin, Marie-Christine Brochier-Salon and Gérard Mortha

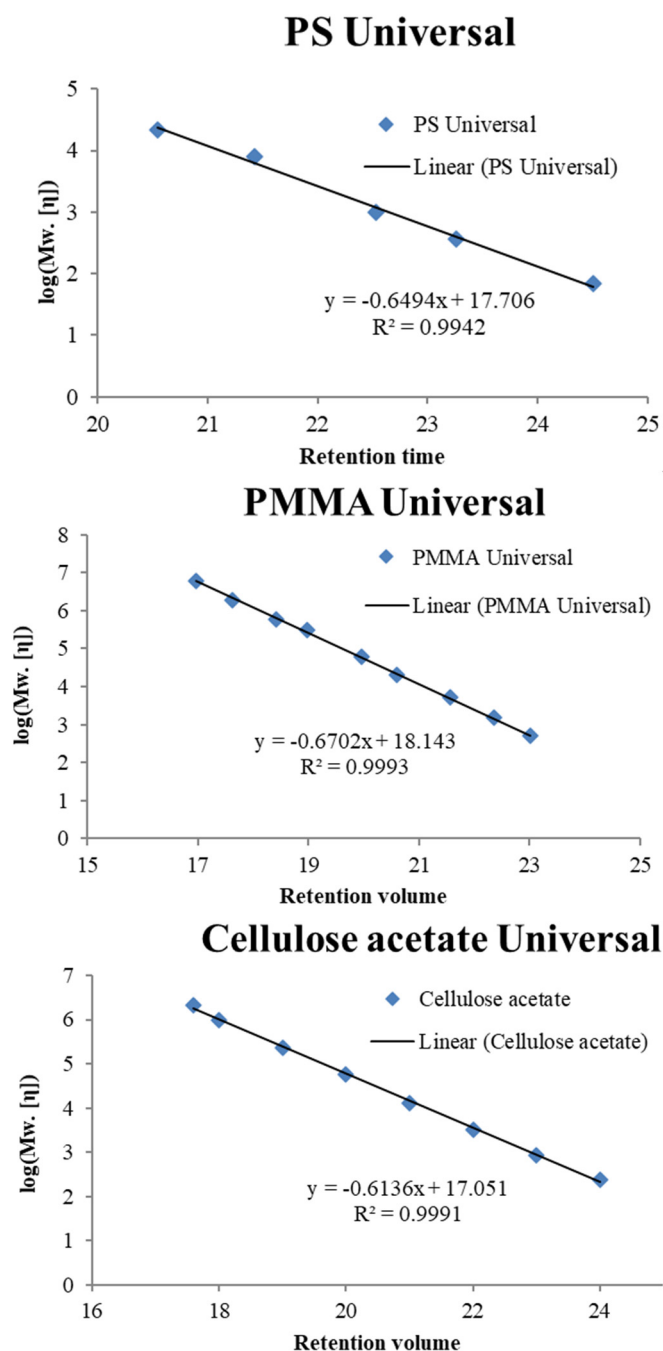

Figure S1. Individual universal calibration curves including data of each type of polymer.

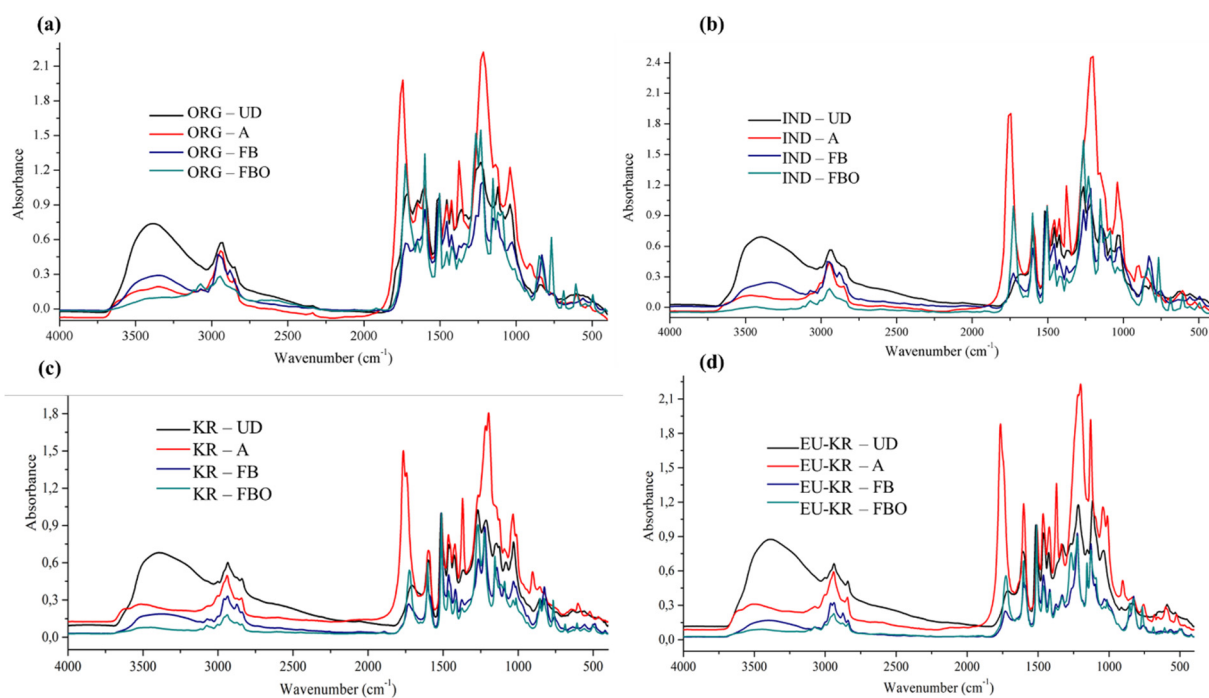

**Figure S2.** FTIR spectra of ethyl acetate washed (a) ORG, (b) IND, (c) KR, and (d) EU-KR (Eucalyptus kraft) lignins, UD—Underivatized, A—Acetylated, FB—Fluorobenzylated, FBO—Fluorobenzoylated.

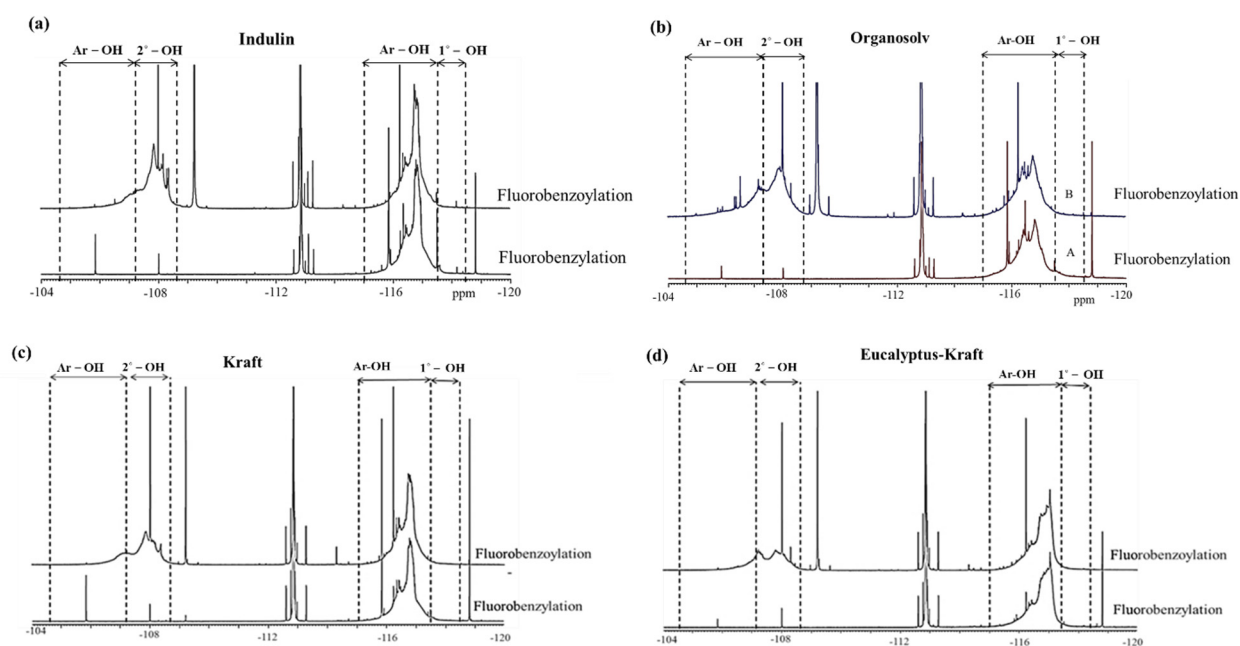

**Figure S3.**  $^{19}\text{F}$  NMR spectra of fluorobenzylated and fluorobenzoylated, (a) ORG, (b) IND, (c) KR, and (d) EU-KR. Chemical shifts relative to  $\text{CFCl}_3$ . Internal standard: 2-fluoroacetophenone.

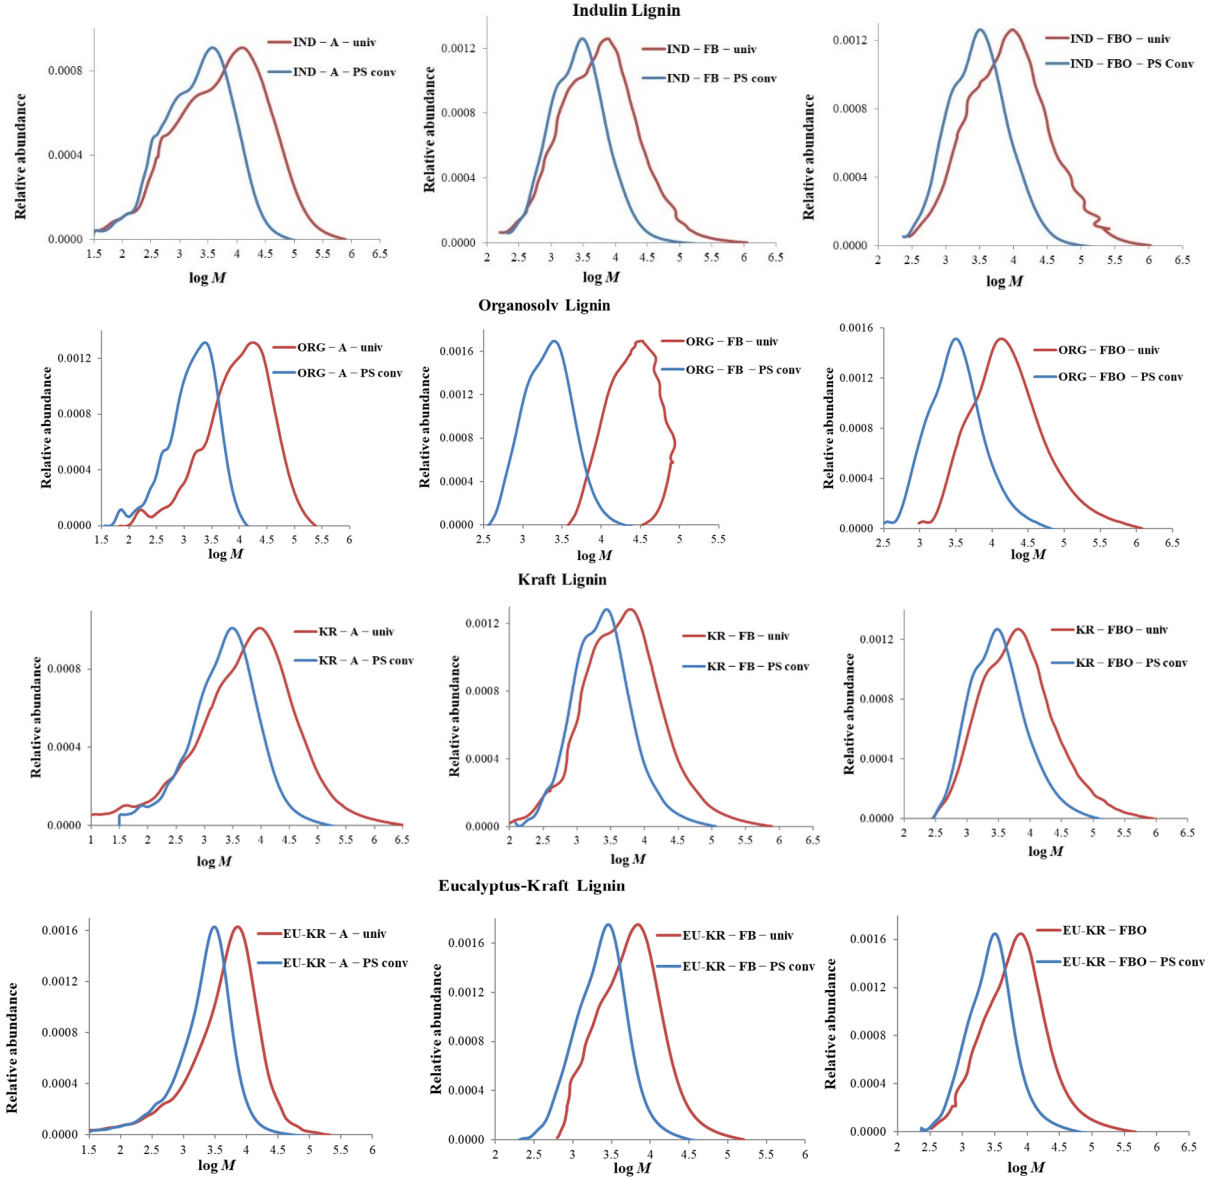

**Figure S4.** SEC—MMD curves (in THF): comparison of universal and standard calibration—calculations from global curve fit; A—acetylated, FB—fluorobenzylated and FBO—fluorobenzoylelated lignin samples. Top to Bottom: IND, ORG, KR and EU-KR.

Equation S1 describes the calculation of the number of moles of hydroxyl groups. The following parameters are required:  $M_L$  = molar mass of lignin,  $M_{IS}$  = molar mass of internal standard,  $A_{LAr-OH}$  = Area of lignin aromatic hydroxyl group,  $A_{LAl-OH}$  = Area of lignin aliphatic hydroxyl group,  $m_L$  = Mass of lignin,  $m_{IS}$  = mass of internal standard,  $M_F$  = molar mass of fluorobenzylated lignin,  $M_{HCl}$  = molar mass of HCl. The step-by-step explanation of this equation can be found in the reference [1].

$$n_{OH} = \frac{M_L}{M_{IS}} \times A_{LAr-OH} \times m_{IS}/m_L \times 1 / \left( 1 - (M_F - M_{HCl}) \times \left( \frac{m_{IS}}{m_L} \right) \times A_{LAr-OH} \times \left( 1 + \left( \frac{A_{LAl-OH}}{A_{LAr-OH}} \right) \right) \right) \quad (S1)$$

The mol/mol values of total hydroxyl groups in fluorobenzylated lignin samples are presented in Table S1. Among the investigated lignins, fluorobenzylation reaction predicted that IND lignin contains the highest total number of phenolic hydroxyls and little part of primary hydroxyls, totally about 0.697 mol/mol aromatic unit. It is followed by

EU-KR lignin (0.642 mol/mol) and by KR lignin (0.628 mol/mol). The least hydroxyl content was obtained for the case of ORG lignin (0.456 mol/mol). It can be pointed out that wheat straw or annual grass plants present lower hydroxyl groups content than hardwood and softwood lignins.

**Table S1.** Total OH groups (in mol/mol aromatic unit) in fluorobenzylated lignin samples, determined by  $^{19}\text{F}$  NMR spectra.

| Lignin<br>(mg) | IS<br>(mg) | FB<br>Carbonylated-ArOH | FB<br>Ar-OH | Total Ar-OH |       | 1°-OH | Total OH |
|----------------|------------|-------------------------|-------------|-------------|-------|-------|----------|
|                |            |                         |             | x           | y     |       |          |
| PB             | 4.3        | A                       | 0.328       | 0.561       | 0.889 | 0.053 |          |
| (15.5)         |            | N                       |             |             | 0.449 | 0.027 | 0.476    |
| ORG            | 3.3        | A                       | 0.505       | 0.603       | 1.108 | 0.078 |          |
| (15.5)         |            | N                       |             |             | 0.426 | 0.030 | 0.456    |
| IND            | 3.2        | A                       | 0.494       | 1.146       | 1.640 | 0.052 |          |
| (15.5)         |            | N                       |             |             | 0.675 | 0.021 | 0.697    |
| KR             | 5.1        | A                       | 0.282       | 0.633       | 0.915 | 0.036 |          |
| (15)           |            | N                       |             |             | 0.604 | 0.024 | 0.628    |
| EU-KR          | 5.2        | A                       | 0.251       | 0.699       | 0.95  | 0.024 |          |
| (15.4)         |            | N                       |             |             | 0.626 | 0.016 | 0.642    |

A – Area of the peak, N – number of moles, x and y represents number of moles of aromatic and aliphatic hydroxyl groups (mol/mol), IS – internal standard.

From the fluorobenzoylation spectra, the number of moles of aromatic (x) and aliphatic hydroxyl groups (y) were calculated, and these values were used for the calculation of the monomer molar mass based on the equation below (Equation S2), with  $M_L = 200$  g/mol,  $M_F = 144.5$  g/mol (FBC) and  $M_{HCl} = 36.5$  g/mol. The calculated “M” value represents the monomer molar mass of fluorobenzylated lignin which therefore will be used for determining the degree of polymerization of all lignin samples.

$$M = M_L + (x + y)M_F - (x + y)M_{HCl} \quad (\text{S2})$$

From the analysis of fluorobenzoylated lignins  $^{19}\text{F}$  NMR spectra and the determination of each peak area, the following Equation S3 was used to calculate the –OH content in derivatized lignins.

$$n_{OHx} = \frac{M_L}{M_{IS}} \times A_{Lix} \times (m_{IS}/m_{Li}) \times 1 / \left[ \left( 1 - (A_{Liu} \times m_{IS}) / (M_{IS} \times m_{Li}) \right) \times (M_{F1} - M_{HCl}) \times \left( 1 + \left( \frac{A_{LiY}}{A_{Liu}} \right) + (M_{F2} - M_{FBA}) \times \frac{(A_{LiV} + A_{LiZ})}{A_{Liu}} \right) \right] \quad (\text{S3})$$

The following parameters are used for the calculations:  $M_{FBC} = 144.5$  g mol $^{-1}$ , FBC = 4-fluorobenzyl chloride,  $M_{HCl} = 36.47$  g mol $^{-1}$ , HCl = hydrochloric acid,  $M_{FBAA} = 262.2$  g mol $^{-1}$ , FBAA = 4-fluorobenzoic acid anhydride,  $M_{FBA} = 140.1$  g mol $^{-1}$ , FBA = Fluorobenzoic acid,  $M_{IS} = 138.14$  g mol $^{-1}$ , IS = Internal standard (2-fluoroacetophenone),  $m_{IS}$  = mass of internal standard,  $m_{Li}$  = mass of lignin,  $A_{Liu}$  = Area corresponding to fluorobenzylated aromatic hydroxyl,  $A_{LiV}$  = Area corresponding to fluorobenzoylated aromatic hydroxyl,  $A_{LiY}$  = Area of primary hydroxyls,  $A_{LiZ}$  = Area of secondary hydroxyls.

The calculated total number of hydroxyl groups present in the lignin are reported in Table S2. From fluorobenzoylation, it is estimated that IND lignin possesses the highest total number of hydroxyl groups, followed by KR lignin. This trend differs from the results obtained by fluorobenzoylation, where EU-KR lignin exhibited more hydroxyl groups than KR lignin. PB hydroxyl groups content is lower than for KR lignin, but higher than for EU-KR; ORG has the lowest content, typically about one-half of the IND lignin. Considering the extraction process employed for the investigated lignins, ORG lignin was extracted by the “lighter process”, in comparison to the aqueous alkaline cooking processes that take place at much higher temperatures. This could play a significant role on the total hydroxyl groups quantity.

**Table S2.** Total OH groups in fluorobenzoylated lignin (in mol mol<sup>-1</sup>), determined by <sup>19</sup>F NMR spectroscopic analysis.

| Lignin<br>(mg) | IS<br>(mg) |   | FBO<br>Ar-OH | FB<br>Ar-OH | Total Ar-<br>OH | 2°-OH | 1°-OH | TOTAL<br>OH <sub>aliph</sub> | Total OH |
|----------------|------------|---|--------------|-------------|-----------------|-------|-------|------------------------------|----------|
|                |            |   | v            | u           |                 | z     | y     |                              |          |
| PB<br>(16.7)   | 4.4        | A | 0.196        | 0.945       |                 | 0.446 | 0.027 |                              |          |
|                |            | n | 0.115        | 0.554       | 0.669           | 0.262 | 0.016 | 0.277                        | 0.931    |
| ORG<br>(15.5)  | 4.2        | A | 0.287        | 0.566       |                 | 0.328 | 0.029 |                              |          |
|                |            | n | 0.155        | 0.305       | 0.460           | 0.177 | 0.016 | 0.193                        | 0.637    |
| IND<br>(15.1)  | 4.8        | A | 0.187        | 0.826       |                 | 0.450 | 0.022 |                              |          |
|                |            | n | 0.141        | 0.623       | 0.764           | 0.339 | 0.017 | 0.356                        | 1.119    |
| KR<br>(16.3)   | 4.8        | A | 0.159        | 0.909       |                 | 0.379 | 0.028 |                              |          |
|                |            | n | 0.105        | 0.601       | 0.706           | 0.251 | 0.019 | 0.269                        | 0.957    |
| EU-KR (16.2)   | 5.2        | A | 0.171        | 0.792       |                 | 0.211 | 0.025 |                              |          |
|                |            | n | 0.116        | 0.536       | 0.652           | 0.143 | 0.017 | 0.160                        | 0.794    |

A—Area of the peak, n—number of moles, u and v describe the number of moles of aromatic hydroxyl groups fluorobenzoylated (mol/mol) and fluorobenzoylated (mol/mol), y and z represent the number of moles of primary aliphatic hydroxyl groups fluorobenzoylated (mol/mol) and fluorobenzoylated (mol/mol) respectively.

In order to calculate the monomer molar mass of fluorobenzoylated lignin samples, u, v, y and z values were extracted from the fluorobenzoylated lignin <sup>19</sup>F NMR spectra (in Table S2) and these values were further substituted in the Equation S4 to find out monomer molar mass of fluorobenzoylated lignin. The following components are considered for the monomer molar mass estimation: M<sub>F2</sub> = molar mass of fluorobenzoic acid anhydride (FBAA), M<sub>FBA</sub> = molar mass of fluorobenzoic acid produced as by-product during fluorobenzoylation, F<sub>1</sub>= FBC molar mass of 4-fluorobenzyl chloride = 144.5 g mol<sup>-1</sup>, M<sub>L</sub> = 200 g mol<sup>-1</sup> (molar mass of lignin monomer unit, assumed to 200 g/mol in all the calculations).

$$M = M_L + (u + y)(M_{F1} - M_{HCl}) + (v + z)(M_{F2} - M_{FBA}) \quad (S4)$$

These results can be compared to hydroxyl groups contents in each lignin samples (given in Table S1 and Table S2). Softwood KR and IND lignins exhibited higher total hydroxyl groups number than hardwood Kraft and annual plant lignins, in which most of the phenolic hydroxyl groups were derivatized during fluorobenzoylation. IND lignin contains significant amount of aliphatic hydroxyl groups which are derivatized during fluorobenzoylation. It is interesting to note that the wheat straw PB lignin showed higher hydroxyl content than hardwood (Eucalyptus) Kraft lignin. ORG lignin (also from wheat straw) exhibited least total hydroxyl content; however its aliphatic hydroxyl content was higher than EUCA-Kraft lignin. Overall, these results revealed that Indulin lignin contains higher amount of total hydroxyl groups than all other lignins.

**Table S3.** Total number of OH groups (in mmol g<sup>-1</sup>) in fluorobenzoylated lignin samples, determined by <sup>19</sup>F NMR spectra.

| Lignin | Fluorobenzoylated |       | Fluorobenzoylated |       | Total OH <sub>Phenol</sub> | Total<br>OH <sub>aliph</sub> | Total OH <sub>Calculated</sub><br>mmol/g derivatized lignin |
|--------|-------------------|-------|-------------------|-------|----------------------------|------------------------------|-------------------------------------------------------------|
|        | Ar-OH             | 1°-OH | Ar-OH             | 2°-OH |                            |                              |                                                             |
| PB     | 1.802             | 0.051 | 0.374             | 0.851 | 2.176                      | 0.902                        | 3.078                                                       |
| ORG    | 1.110             | 0.057 | 0.563             | 0.643 | 1.673                      | 0.700                        | 2.373                                                       |
| IND    | 1.901             | 0.051 | 0.430             | 1.036 | 2.331                      | 1.087                        | 3.418                                                       |
| KR     | 1.938             | 0.060 | 0.339             | 0.808 | 2.277                      | 0.868                        | 3.145                                                       |
| EU-KR  | 1.840             | 0.058 | 0.397             | 0.490 | 2.237                      | 0.548                        | 2.785                                                       |

**Table S4.** MMD of derivatized IND lignin from universal calibration with global curve fit and individual curve fit and comparison with standard calibration. (M values in g mol<sup>-1</sup>).

|                                    | Universal calibration<br>(Viscometric detector) |                |                                |                   | Standard calibration<br>(RI detector) |                |                                |                   |
|------------------------------------|-------------------------------------------------|----------------|--------------------------------|-------------------|---------------------------------------|----------------|--------------------------------|-------------------|
| IND-Acetylated                     | M <sub>n</sub>                                  | M <sub>w</sub> | M <sub>w</sub> /M <sub>n</sub> | M <sub>peak</sub> | M <sub>n</sub>                        | M <sub>w</sub> | M <sub>w</sub> /M <sub>n</sub> | M <sub>peak</sub> |
| Fit with Global curve <sup>a</sup> | 1090                                            | 19920          | 18.3                           | 12300             | -                                     | -              | -                              | -                 |
| PS                                 | 950                                             | 17980          | 18.9                           | 10990             | 820                                   | 4530           | 5.5                            | 3770              |
| PMMA                               | 720                                             | 16860          | 23.4                           | 9690              | 1040                                  | 5680           | 5.5                            | 4750              |
| Cellulose acetate                  | 1880                                            | 25150          | 13.4                           | 16970             | 1160                                  | 3940           | 3.4                            | 3700              |
| <b>IND-Fluorobenzylated</b>        |                                                 |                |                                |                   |                                       |                |                                |                   |
| Fit with Global curve <sup>a</sup> | 2440                                            | 15390          | 6.3                            | 7600              | -                                     | -              | -                              | -                 |
| PS                                 | 2150                                            | 13890          | 6.5                            | 6780              | 1660                                  | 4490           | 2.7                            | 3040              |
| PMMA                               | 1750                                            | 13020          | 7.4                            | 5920              | 2110                                  | 5630           | 2.7                            | 3830              |
| Cellulose acetate                  | 3790                                            | 19480          | 5.1                            | 10670             | 1970                                  | 3980           | 2.0                            | 3090              |
| <b>IND-Fluorobenzoylated</b>       |                                                 |                |                                |                   |                                       |                |                                |                   |
| Fit with Global curve <sup>a</sup> | 3760                                            | 22270          | 5.9                            | 9700              | -                                     | -              | -                              | -                 |
| PS                                 | 3320                                            | 20100          | 6.1                            | 8650              | 1910                                  | 5040           | 2.6                            | 3210              |
| PMMA                               | 2730                                            | 18870          | 6.9                            | 7570              | 2420                                  | 6310           | 2.6                            | 4050              |
| Cellulose acetate                  | 5780                                            | 28080          | 4.9                            | 13550             | 2210                                  | 4400           | 2.0                            | 3230              |

a = fit with global curve (PS, PMMA, cellulose acetate).

**Table S5.** MMD of derivatized ORG lignin, from universal calibration with global curve fit and individual curve fit, and comparison with standard calibration. (M values in g mol<sup>-1</sup>).

|                                    | Universal calibration<br>(Viscometric detector) |                |                                |                   | Standard calibration<br>(RI detector) |                |                                |                   |
|------------------------------------|-------------------------------------------------|----------------|--------------------------------|-------------------|---------------------------------------|----------------|--------------------------------|-------------------|
| ORG-Acetylated                     | M <sub>n</sub>                                  | M <sub>w</sub> | M <sub>w</sub> /M <sub>n</sub> | M <sub>peak</sub> | M <sub>n</sub>                        | M <sub>w</sub> | M <sub>w</sub> /M <sub>n</sub> | M <sub>peak</sub> |
| Fit with Global curve <sup>a</sup> | 2900                                            | 18950          | 6.5                            | 17810             | -                                     | -              | -                              | -                 |
| PS                                 | 2530                                            | 16930          | 6.7                            | 15850             | 770                                   | 2100           | 2.7                            | 2380              |
| PMMA                               | 1940                                            | 14920          | 7.7                            | 13660             | 980                                   | 2650           | 2.7                            | 3010              |
| Cellulose acetate                  | 4950                                            | 26270          | 5.3                            | 25500             | 1070                                  | 2160           | 2.0                            | 2520              |
| <b>ORG-Fluorobenzylated</b>        |                                                 |                |                                |                   |                                       |                |                                |                   |
| Fit with Global curve <sup>a</sup> | 17981                                           | 27328          | 1.5                            | 32630             | -                                     | -              | -                              | -                 |
| PS                                 | 17480                                           | 29170          | 1.7                            | 29050             | 1680                                  | 2690           | 1.6                            | 2500              |
| PMMA                               | 14610                                           | 25550          | 1.7                            | 25100             | 2130                                  | 3390           | 1.6                            | 3150              |
| Cellulose acetate                  | 29610                                           | 45760          | 1.5                            | 46540             | 1930                                  | 2700           | 1.4                            | 2620              |
| <b>ORG-Fluorobenzoylated</b>       |                                                 |                |                                |                   |                                       |                |                                |                   |
| Fit with Global curve <sup>a</sup> | 8600                                            | 34410          | 4.0                            | 13540             | -                                     | -              | -                              | -                 |
| PS                                 | 7620                                            | 31030          | 4.1                            | 12080             | 2240                                  | 4800           | 2.1                            | 3180              |
| PMMA                               | 6400                                            | 28970          | 4.5                            | 10570             | 2850                                  | 6020           | 2.1                            | 4015              |
| Cellulose acetate                  | 12800                                           | 43720          | 3.4                            | 18940             | 2500                                  | 4270           | 1.7                            | 3210              |

a = fit with global curve (PS, PMMA, cellulose acetate).

**Table S6.** MMD of derivatized KR lignin, from universal calibration with global curve fit and individual curve fit, and comparison with standard calibration. (M values in g mol<sup>-1</sup>).

|                                    | Universal calibration<br>(Viscometric detector) |                |                                |                   | Standard calibration<br>(RI detector) |                |                                |                   |
|------------------------------------|-------------------------------------------------|----------------|--------------------------------|-------------------|---------------------------------------|----------------|--------------------------------|-------------------|
| KR-Acetylated                      | M <sub>n</sub>                                  | M <sub>w</sub> | M <sub>w</sub> /M <sub>n</sub> | M <sub>peak</sub> | M <sub>n</sub>                        | M <sub>w</sub> | M <sub>w</sub> /M <sub>n</sub> | M <sub>peak</sub> |
| Fit with Global curve <sup>a</sup> | 540                                             | 31060          | 57.5                           | 9520              | -                                     | -              | -                              | -                 |
| PS                                 | 470                                             | 28190          | 60.0                           | 8490              | 750                                   | 5110           | 6.8                            | 3100              |
| PMMA                               | 350                                             | 27270          | 77.9                           | 7420              | 960                                   | 6380           | 6.6                            | 3910              |
| Cellulose acetate                  | 990                                             | 37450          | 37.8                           | 13340             | 1110                                  | 4290           | 3.9                            | 3130              |
| <b>KR-Fluorobenzylated</b>         |                                                 |                |                                |                   |                                       |                |                                |                   |
| Fit with Global curve <sup>a</sup> | 2190                                            | 13670          | 6.2                            | 6250              | -                                     | -              | -                              | -                 |
| PS                                 | 1930                                            | 12340          | 6.4                            | 5570              | 1510                                  | 4170           | 2.8                            | 2770              |
| PMMA                               | 1560                                            | 11550          | 7.4                            | 4840              | 1920                                  | 5230           | 2.7                            | 3490              |
| Cellulose acetate                  | 3430                                            | 17340          | 5.1                            | 8840              | 1820                                  | 3710           | 2.0                            | 2850              |
| <b>KR-Fluorobenzoylated</b>        |                                                 |                |                                |                   |                                       |                |                                |                   |
| Fit with Global curve <sup>a</sup> | 3210                                            | 18190          | 5.7                            | 6530              | -                                     | -              | -                              | -                 |
| PS                                 | 2840                                            | 16450          | 5.8                            | 5830              | 2020                                  | 5580           | 2.8                            | 3040              |
| PMMA                               | 2350                                            | 15630          | 6.7                            | 5090              | 2570                                  | 6980           | 2.7                            | 3830              |
| Cellulose acetate                  | 4860                                            | 22540          | 4.6                            | 9170              | 2310                                  | 4730           | 2.0                            | 3090              |

a = fit with global curve (PS, PMMA, cellulose acetate).

**Table S7.** MMD of derivatized EU-KR lignin from universal calibration with global curve fit and individual curve fit, and comparison with standard calibration. (M values in g mol<sup>-1</sup>).

|                                    | Universal calibration<br>(Viscometric detector) |                |                                |                | Standard calibration<br>(RI detector) |                |                                |                   |
|------------------------------------|-------------------------------------------------|----------------|--------------------------------|----------------|---------------------------------------|----------------|--------------------------------|-------------------|
| EU-KR-Acetylated                   | M <sub>n</sub>                                  | M <sub>w</sub> | M <sub>w</sub> /M <sub>n</sub> | M <sub>p</sub> | M <sub>n</sub>                        | M <sub>w</sub> | M <sub>w</sub> /M <sub>n</sub> | M <sub>peak</sub> |
| Fit with Global curve <sup>a</sup> | 1260                                            | 8460           | 6.7                            | 7270           | -                                     | -              | -                              | -                 |
| PS                                 | 1100                                            | 7580           | 6.9                            | 6480           | 1010                                  | 3210           | 3.2                            | 3070              |
| PMMA                               | 840                                             | 6820           | 8.1                            | 5660           | 1300                                  | 4040           | 3.1                            | 3870              |
| Cellulose acetate                  | 2150                                            | 11370          | 5.3                            | 10200          | 1390                                  | 3080           | 2.2                            | 3110              |
| <b>EU-KR-Fluorobenzylated</b>      |                                                 |                |                                |                |                                       |                |                                |                   |
| Fit with Global curve <sup>a</sup> | 3390                                            | 8580           | 2.5                            | 7000           | -                                     | -              | -                              | -                 |
| PS                                 | 3000                                            | 7680           | 2.6                            | 6240           | 1780                                  | 3130           | 1.8                            | 2870              |
| PMMA                               | 2500                                            | 6880           | 2.8                            | 5430           | 2260                                  | 3940           | 1.7                            | 3630              |
| Cellulose acetate                  | 5120                                            | 11610          | 2.3                            | 9870           | 2040                                  | 3050           | 1.5                            | 2940              |
| <b>EU-KR-Fluorobenzoylated</b>     |                                                 |                |                                |                |                                       |                |                                |                   |
| Fit with Global curve <sup>a</sup> | 3630                                            | 13210          | 3.6                            | 7990           | -                                     | -              | -                              | -                 |
| PS                                 | 3210                                            | 11890          | 3.7                            | 7130           | 2040                                  | 4060           | 2.0                            | 3200              |
| PMMA                               | 2670                                            | 10930          | 4.1                            | 6240           | 2580                                  | 5100           | 2.0                            | 4040              |
| Cellulose acetate                  | 5470                                            | 17200          | 3.1                            | 11170          | 2300                                  | 3740           | 1.6                            | 3230              |

a = fit with global curve (PS, PMMA, cellulose acetate).

**Table S8.** DP-average from standard calibration (solvent = THF; individual curve fit).

| Standard calibration in THF |            |                          |                 |                 |            |                 |                 |            |                   |                 |            |
|-----------------------------|------------|--------------------------|-----------------|-----------------|------------|-----------------|-----------------|------------|-------------------|-----------------|------------|
|                             |            |                          | Polystyrene     |                 |            | PMMA            |                 |            | Cellulose acetate |                 |            |
|                             |            | Molar mass<br>of monomer | DP <sub>n</sub> | DP <sub>w</sub> | dispersity | DP <sub>n</sub> | DP <sub>w</sub> | dispersity | DP <sub>n</sub>   | DP <sub>w</sub> | dispersity |
| PB                          | Acetylated | 240                      | 2               | 12              | 5          | 3               | 15              | 5          | 4                 | 11              | 3          |
|                             | FB         | 251*                     | 6               | 13              | 2          | 7               | 16              | 2          | 7                 | 12              | 2          |
|                             | FBO        | 308*                     | 7               | 18              | 3          | 9               | 22              | 2          | 8                 | 15              | 2          |
| IND                         | Acetylated | 240                      | 3               | 19              | 6          | 4               | 24              | 5          | 5                 | 16              | 3          |
|                             | FB         | 275*                     | 6               | 16              | 3          | 8               | 20              | 3          | 7                 | 14              | 2          |
|                             | FBO        | 328*                     | 6               | 15              | 3          | 7               | 19              | 3          | 7                 | 13              | 2          |
| ORG                         | Acetylated | 240                      | 3               | 9               | 2.7        | 4               | 11              | 2.7        | 4                 | 9               | 2.0        |
|                             | FB         | 249*                     | 7               | 11              | 1.6        | 9               | 14              | 1.6        | 8                 | 11              | 1.4        |
|                             | FBO        | 275*                     | 8               | 17              | 2.1        | 10              | 22              | 2.1        | 9                 | 16              | 1.7        |
| KR                          | Acetylated | 240                      | 3               | 21              | 6.8        | 4               | 27              | 6.7        | 5                 | 18              | 3.9        |
|                             | FB         | 268*                     | 6               | 16              | 2.8        | 7               | 20              | 2.7        | 7                 | 14              | 2.0        |
|                             | FBO        | 310*                     | 7               | 18              | 2.8        | 8               | 22              | 2.7        | 7                 | 15              | 2.0        |
| EU-KR                       | Acetylated | 240                      | 4               | 13              | 3.2        | 5               | 17              | 3.1        | 6                 | 13              | 2.2        |
|                             | FB         | 269*                     | 7               | 12              | 1.8        | 8               | 15              | 1.7        | 8                 | 11              | 1.5        |
|                             | FBO        | 291*                     | 7               | 14              | 2.0        | 9               | 18              | 2.0        | 8                 | 13              | 1.6        |

\* Monomer molar mass of FB and FBO lignins calculated from <sup>19</sup>F NMR; DP<sub>w</sub>/DP<sub>n</sub> = dispersity.

## References

1. Esakkimuthu, E.S. Study of New Chemical Derivatization Techniques for Lignin Analysis by Size Exclusion Chromatography. Ph.D. Thesis, Université Grenoble Alpes, Grenoble, France, 2020.
